# Supplementary material
Source: PubMed Central journal article supplement (PMC3654755)
Supplement: supp_jit119_jit119supp.pdf [file supp_jit119_jit119supp.pdf]

**Supplemental Table 1. Genetic and functional characteristics of human mAbs**

| Type of infection       | Subject # | mAb    | IgG subclass | λ or κ | Binding to whole virus in ELISA, for indicated serotype at 1 μg/mL |    |    |    | Binding to rE-protein (ELISA) | Binding to rE-protein DIII fragment (ELISA) | Binding to rE-protein DI/II fragment (ELISA) | Binding to rPr-protein (ELISA) | 50% neutralization concentration (μg/mL), against indicated serotype |      |     |     | Fold enhancement of infection, for indicated serotype at 1 μg/mL |     |     |    |
|-------------------------|-----------|--------|--------------|--------|--------------------------------------------------------------------|----|----|----|-------------------------------|---------------------------------------------|----------------------------------------------|--------------------------------|----------------------------------------------------------------------|------|-----|-----|------------------------------------------------------------------|-----|-----|----|
|                         |           |        |              |        | D1                                                                 | D2 | D3 | D4 |                               |                                             |                                              |                                | D1                                                                   | D2   | D3  | D4  | D1                                                               | D2  | D3  | D4 |
| rDENV1<br>Delta30       | 32        | 1K12   | IgG1         | λ      | +                                                                  | +  | +  | +  | +                             | +                                           | -                                            | -                              | >10                                                                  | >10  | >10 | >10 | 56                                                               | 1   | 1   | 1  |
|                         | 33        | 1C8    | IgG1         | κ      | +                                                                  | +  | +  | +  | -                             | -                                           | -                                            | +                              | >10                                                                  | >10  | >10 | >10 | 13                                                               | 31  | 130 | 15 |
|                         |           | 1021.2 | IgG1         | κ      | +                                                                  | +  | +  | +  | +                             | +                                           | -                                            | -                              | >10                                                                  | >10  | >10 | >10 | 1                                                                | 0   | 1   | 1  |
|                         | 35        | 1D7.3  | IgG1         | λ      | +                                                                  | +  | +  | +  | +                             | +                                           | -                                            | -                              | >10                                                                  | >10  | >10 | >10 | 27                                                               | 9   | 20  | 1  |
|                         |           | 1N23   | IgG3         | κ      | +                                                                  | +  | +  | -  | +                             | +                                           | -                                            | -                              | >10                                                                  | >10  | >10 | >10 | 3                                                                | 18  | 6   | 1  |
|                         |           | 1C9    | IgG1         | λ      | +                                                                  | +  | +  | +  | -                             | -                                           | -                                            | +                              | >10                                                                  | >10  | >10 | >10 | 15                                                               | 40  | 54  | 13 |
|                         | 38        | 1I23   | IgG1         | κ      | +                                                                  | +  | +  | -  | +                             | +                                           | -                                            | -                              | >10                                                                  | >10  | >10 | >10 | 4                                                                | 18  | 28  | 1  |
|                         | 39        | 106    | IgG1         | κ      | +                                                                  | +  | +  | +  | -                             | -                                           | -                                            | +                              | >10                                                                  | >10  | >10 | >10 | 119                                                              | 67  | 54  | 15 |
|                         |           | 1I15   | IgG1         | κ      | +                                                                  | +  | +  | +  | -                             | -                                           | -                                            | +                              | >10                                                                  | >10  | >10 | >10 | 92                                                               | 74  | 37  | 4  |
|                         | 40        | 1C19.2 | IgG1         | κ      | +                                                                  | +  | +  | +  | +                             | +                                           | -                                            | -                              | 0.22                                                                 | >10  | >10 | >10 | 5                                                                | 1   | 1   | 1  |
|                         |           | 1O10   | IgG1         | λ      | +                                                                  | +  | +  | +  | +                             | +                                           | -                                            | +                              | >10                                                                  | >10  | >10 | >10 | 146                                                              | 166 | 40  | 6  |
|                         | 44        | 1J16.2 | IgG1         | κ      | +                                                                  | +  | +  | +  | +                             | +                                           | -                                            | +                              | >10                                                                  | >10  | >10 | >10 | 97                                                               | 88  | 26  | 3  |
|                         | 45        | 1D7.2  | IgG1         | κ      | +                                                                  | +  | +  | +  | +                             | +                                           | -                                            | +                              | >10                                                                  | >10  | >10 | >10 | 65                                                               | 53  | 17  | 2  |
|                         |           | 1L18   | IgG1         | λ      | +                                                                  | +  | +  | +  | -                             | -                                           | -                                            | +                              | >10                                                                  | >10  | >10 | >10 | 81                                                               | 60  | 30  | 6  |
|                         |           | 1E8    | IgG1         | κ      | +                                                                  | +  | +  | +  | +                             | +                                           | -                                            | +                              | >10                                                                  | >10  | >10 | >10 | 6                                                                | 3   | 24  | 4  |
|                         | 47        | 1C22   | IgG1         | λ      | +                                                                  | +  | +  | -  | +                             | +                                           | -                                            | -                              | 2.5                                                                  | >10  | >10 | >10 | 3                                                                | 11  | 10  | 2  |
|                         |           | 1I14   | IgG1         | κ      | +                                                                  | +  | +  | +  | -                             | -                                           | -                                            | +                              | >10                                                                  | >10  | >10 | >10 | 5                                                                | 10  | 7   | 2  |
|                         |           | 1E1    | IgG1         | κ      | +                                                                  | +  | +  | +  | +                             | +                                           | -                                            | +                              | >10                                                                  | >10  | >10 | >10 | 8                                                                | 8   | 26  | 4  |
|                         | 49        | 1M12.2 | IgG1         | κ      | +                                                                  | +  | +  | +  | +                             | +                                           | -                                            | +                              | >10                                                                  | >10  | >10 | >10 | 8                                                                | 8   | 30  | 1  |
|                         |           | 1H7    | IgG1         | κ      | +                                                                  | -  | +  | +  | -                             | -                                           | -                                            | +                              | >10                                                                  | >10  | >10 | >10 | 13                                                               | 1   | 13  | 5  |
| 53                      | 1L13      | IgG1   | λ            | +      | +                                                                  | +  | +  | -  | -                             | -                                           | +                                            | >10                            | >10                                                                  | 0.24 | >10 | 9   | 15                                                               | 15  | 9   |    |
|                         | 1I7       | IgG1   | λ            | +      | +                                                                  | +  | +  | +  | +                             | -                                           | +                                            | >10                            | >10                                                                  | >10  | >10 | 8   | 28                                                               | 10  | 2   |    |
| 55                      | 1P11      | IgG3   | λ            | +      | +                                                                  | +  | +  | -  | -                             | -                                           | +                                            | >10                            | >10                                                                  | >10  | >10 | 26  | 23                                                               | 213 | 4   |    |
| 57                      | 1I6       | IgG1   | λ            | +      | +                                                                  | +  | +  | +  | -                             | +                                           | -                                            | >10                            | >10                                                                  | >10  | >10 | 11  | 11                                                               | 56  | 5   |    |
|                         | 1D3       | IgG1   | κ            | +      | +                                                                  | +  | -  | -  | -                             | -                                           | +                                            | >10                            | >10                                                                  | >10  | >10 | 11  | 11                                                               | 56  | 5   |    |
| 58                      | 1M18      | IgG1   | λ            | +      | +                                                                  | +  | +  | +  | +                             | -                                           | +                                            | >10                            | >10                                                                  | >10  | >10 | 8   | 7                                                                | 35  | 1   |    |
| 1 <sup>o</sup><br>DENV1 | 006       | 1B17.2 | IgG1         | κ      | +                                                                  | +  | +  | +  | +                             | +                                           | -                                            | -                              | >10                                                                  | >10  | >10 | >10 | 3                                                                | 3   | 4   | 3  |
|                         |           | 1O12   | IgG1         | κ      | +                                                                  | +  | +  | +  | +                             | +                                           | -                                            | -                              | >10                                                                  | >10  | >10 | >10 | 1                                                                | 1   | 12  | 1  |
|                         | 106       | 1E23   | IgG1         | λ      | +                                                                  | +  | +  | +  | -                             | -                                           | -                                            | +                              | >10                                                                  | >10  | >10 | >10 | 8                                                                | 6   | 55  | 3  |
|                         |           | 2F13   | IgG1         | κ      | +                                                                  | +  | +  | +  | +                             | +                                           | -                                            | +                              | >10                                                                  | >10  | >10 | >10 | 5                                                                | 5   | 3   | 1  |
|                         |           | 1L21   | IgG1         | κ      | +                                                                  | +  | +  | +  | +                             | +                                           | -                                            | -                              | >10                                                                  | >10  | >10 | >10 | 5                                                                | 7   | 1   | 1  |
|                         |           | 1M6.2  | IgG1         | κ      | +                                                                  | +  | +  | +  | +                             | +                                           | -                                            | +                              | >10                                                                  | 8.2  | >10 | >10 | 4                                                                | 3   | 29  | 1  |
|                         |           | 1H7.2  | IgG1         | λ      | +                                                                  | +  | +  | +  | -                             | -                                           | -                                            | +                              | >10                                                                  | >10  | >10 | >10 | 11                                                               | 9   | 30  | 4  |
| 2E14                    | IgG1      | κ      | +            | +      | +                                                                  | +  | +  | +  | -                             | +                                           | >10                                          | >10                            | >10                                                                  | >10  | 31  | 13  | 10                                                               | 4   |     |    |

Immunoglobulin isotype, subtype and light chain utilization were determined by ELISA. Binding to each DENV serotype and recombinant E and prM protein constructs are shown. The concentration (μg/mL) at which 50% of virus was neutralized (neut<sub>50</sub>) is shown for each dengue serotype: a dash indicates neut<sub>50</sub> value > 10 μg/mL, neut<sub>50</sub> values between 1.0-10.0 μg/mL are shown, neut<sub>50</sub> values < 0.5 μg/mL are bold. ADE assays were performed for each human antibody (at a concentration of 1 μg/mL) against each dengue serotype and shown as fold enhancement: > 25 fold enhancement values are bold.

**Supplemental Table 1. Genetic and functional characteristics of human mAbs (continued)**

| Type of infection       | Subject # | mAb    | IgG subclass | $\lambda$ or $\kappa$ | Binding to whole virus in ELISA, for indicated serotype at 1 $\mu$ g/mL |    |    |    | Binding to rE-protein (ELISA) | Binding to rE-protein DIII fragment (ELISA) | Binding to rE-protein DI/II fragment (ELISA) | Binding to rPr-protein (ELISA) | 50% neutralization concentration ( $\mu$ g/mL), against indicated serotype |      |      |     | Fold enhancement of infection, for indicated serotype at 1 $\mu$ g/mL |    |    |    |   |
|-------------------------|-----------|--------|--------------|-----------------------|-------------------------------------------------------------------------|----|----|----|-------------------------------|---------------------------------------------|----------------------------------------------|--------------------------------|----------------------------------------------------------------------------|------|------|-----|-----------------------------------------------------------------------|----|----|----|---|
|                         |           |        |              |                       | D1                                                                      | D2 | D3 | D4 |                               |                                             |                                              |                                | D1                                                                         | D2   | D3   | D4  | D1                                                                    | D2 | D3 | D4 |   |
| 1 <sup>o</sup><br>DENV1 | 106       | 1K16.2 | IgG1         | $\lambda$             | +                                                                       | +  | +  | +  | +                             | -                                           | +                                            | -                              | >10                                                                        | >10  | >10  | >10 | 8                                                                     | 35 | 19 | 3  |   |
|                         |           | 1K4.2  | IgG1         | $\kappa$              | +                                                                       | +  | +  | +  | -                             | -                                           | -                                            | +                              | >10                                                                        | >10  | >10  | >10 | 5                                                                     | 15 | 6  | 2  |   |
|                         |           | 2H21   | IgG1         | $\lambda$             | +                                                                       | +  | +  | +  | -                             | -                                           | -                                            | +                              | >10                                                                        | >10  | >10  | >10 | 21                                                                    | 4  | 18 | 4  |   |
|                         |           | 2B17   | IgG1         | $\lambda$             | +                                                                       | +  | +  | +  | -                             | -                                           | -                                            | +                              | >10                                                                        | >10  | >10  | >10 | 3                                                                     | 3  | 4  | 3  |   |
|                         |           | 2G3    | IgG1         | $\lambda$             | +                                                                       | +  | +  | +  | -                             | -                                           | -                                            | +                              | >10                                                                        | >10  | >10  | >10 | 22                                                                    | 4  | 47 | 8  |   |
|                         |           | 2J9    | IgG1         | $\lambda$             | +                                                                       | +  | +  | +  | -                             | -                                           | -                                            | +                              | >10                                                                        | >10  | >10  | >10 | 9                                                                     | 8  | 25 | 11 |   |
|                         |           | 1G19   | IgG1         | $\kappa$              | +                                                                       | +  | +  | +  | +                             | -                                           | +                                            | -                              | -                                                                          | >10  | >10  | >10 | >10                                                                   | 4  | 10 | 4  | 2 |
|                         |           | 1N21   | IgG1         | $\kappa$              | +                                                                       | +  | +  | +  | +                             | +                                           | +                                            | -                              | -                                                                          | >10  | >10  | >10 | >10                                                                   | 10 | 7  | 44 | 2 |
|                         |           | 1I13.2 | IgG1         | $\lambda$             | +                                                                       | +  | +  | +  | -                             | -                                           | -                                            | +                              | >10                                                                        | >10  | >10  | >10 | 8                                                                     | 15 | 16 | 8  |   |
|                         |           | 1D8    | IgG1         | $\kappa$              | +                                                                       | +  | +  | +  | +                             | +                                           | -                                            | +                              | -                                                                          | >10  | >10  | >10 | >10                                                                   | 5  | 9  | 8  | 6 |
|                         |           | 1A17   | IgG1         | $\kappa$              | +                                                                       | +  | +  | +  | -                             | -                                           | -                                            | +                              | >10                                                                        | >10  | >10  | >10 | 118                                                                   | 60 | 47 | 4  |   |
|                         |           | 1D6    | IgG1         | $\kappa$              | +                                                                       | +  | +  | +  | +                             | +                                           | -                                            | +                              | -                                                                          | >10  | >10  | >10 | >10                                                                   | 3  | 6  | 4  | 4 |
|                         |           | 1N6    | IgG1         | $\kappa$              | +                                                                       | -  | -  | -  | -                             | +                                           | +                                            | -                              | -                                                                          | >10  | >10  | >10 | >10                                                                   | 5  | 0  | 1  | 1 |
|                         |           | 2M23   | IgG1         | $\lambda$             | +                                                                       | +  | +  | +  | +                             | +                                           | +                                            | -                              | -                                                                          | >10  | >10  | >10 | >10                                                                   | 15 | 5  | 34 | 4 |
|                         |           | 2I11   | IgG1         | $\lambda$             | +                                                                       | +  | +  | +  | +                             | -                                           | -                                            | -                              | +                                                                          | >10  | >10  | >10 | >10                                                                   | 24 | 6  | 26 | 5 |
|                         |           | 2J21   | IgG1         | $\kappa$              | +                                                                       | +  | +  | +  | +                             | +                                           | -                                            | +                              | -                                                                          | >10  | >10  | >10 | >10                                                                   | 18 | 7  | 28 | 1 |
|                         |           | 2I21   | IgG1         | $\lambda$             | +                                                                       | +  | +  | +  | +                             | +                                           | +                                            | -                              | -                                                                          | >10  | >10  | >10 | >10                                                                   | 14 | 7  | 4  | 1 |
|                         |           | 2E19   | IgG1         | $\lambda$             | +                                                                       | +  | +  | +  | +                             | +                                           | -                                            | +                              | -                                                                          | >10  | >10  | >10 | >10                                                                   | 1  | 3  | 2  | 2 |
|                         |           | 2I23   | IgG3         | $\lambda$             | +                                                                       | +  | +  | +  | +                             | +                                           | -                                            | +                              | -                                                                          | >10  | >10  | >10 | >10                                                                   | 5  | 1  | 1  | 1 |
|                         |           | 2O19   | IgG1         | $\lambda$             | +                                                                       | +  | +  | +  | +                             | +                                           | +                                            | -                              | -                                                                          | >10  | >10  | >10 | >10                                                                   | 2  | 2  | 2  | 1 |
|                         | 2J23      | IgG1   | $\kappa$     | +                     | +                                                                       | +  | +  | +  | +                             | -                                           | +                                            | -                              | >10                                                                        | >10  | >10  | >10 | 25                                                                    | 6  | 7  | 3  |   |
|                         | 2B20      | IgG1   | $\kappa$     | +                     | +                                                                       | +  | +  | +  | +                             | -                                           | +                                            | -                              | >10                                                                        | >10  | >10  | >10 | 19                                                                    | 5  | 0  | 1  |   |
|                         | 2D22.2    | IgG1   | $\lambda$    | +                     | +                                                                       | +  | +  | +  | +                             | -                                           | +                                            | -                              | >10                                                                        | >10  | >10  | >10 | 10                                                                    | 6  | 1  | 2  |   |
|                         | GL10      | 2F17.2 | IgG1         | $\lambda$             | +                                                                       | +  | +  | +  | +                             | +                                           | -                                            | +                              | -                                                                          | >10  | >10  | >10 | >10                                                                   | 2  | 3  | 2  | 1 |
|                         |           | 1H16.2 | IgG1         | $\kappa$              | +                                                                       | +  | +  | -  | -                             | -                                           | -                                            | +                              | >10                                                                        | >10  | >10  | >10 | 1                                                                     | 5  | 3  | 2  |   |
|                         |           | 1M4    | IgG1         | $\kappa$              | +                                                                       | +  | +  | +  | +                             | +                                           | -                                            | +                              | -                                                                          | 0.56 | 0.27 | 5.4 | 2.3                                                                   | 6  | 1  | 56 | 1 |
| 1I3.2                   |           | IgG1   | $\kappa$     | +                     | +                                                                       | +  | +  | +  | +                             | -                                           | +                                            | -                              | >10                                                                        | >10  | >10  | >10 | 9                                                                     | 5  | 18 | 8  |   |
| 2H2                     |           | IgG1   | $\kappa$     | +                     | +                                                                       | +  | +  | +  | -                             | -                                           | -                                            | +                              | >10                                                                        | >10  | >10  | >10 | 6                                                                     | 9  | 15 | 1  |   |
| GL24                    | 2G19      | IgG2   | $\lambda$    | +                     | +                                                                       | +  | -  | -  | -                             | -                                           | +                                            | >10                            | >10                                                                        | >10  | >10  | 14  | 13                                                                    | 53 | 7  |    |   |

Immunoglobulin isotype, subtype and light chain utilization were determined by ELISA. Binding to each DENV serotype and recombinant E and prM protein constructs are shown. The concentration ( $\mu$ g/mL) at which 50% of virus was neutralized ( $neut_{50}$ ) is shown for each dengue serotype: a dash indicates  $neut_{50}$  value > 10  $\mu$ g/mL,  $neut_{50}$  values between 1.0-10.0  $\mu$ g/mL are shown,  $neut_{50}$  values < 0.5  $\mu$ g/mL are bold. ADE assays were performed for each human antibody (at a concentration of 1  $\mu$ g/mL) against each dengue serotype and shown as fold enhancement: > 25 fold enhancement values are bold.

## SUPPLEMENTAL MATERIALS AND METHODS

### Recombinant DENV Proteins

Recombinant proteins representing fragments of E or prM-protein were used to determine antigens and domains recognized by human monoclonal antibodies. Recombinant DENV proteins were constructed using sequences of the above strains. Sequence optimization, gene synthesis and molecular cloning of all recombinant DENV protein constructs for expression in baculovirus was performed by GenScript USA Inc. The amino acid residues for E-protein constructs (rE) were as follows: DENV1 E80% (1-397), DENV2 E80% (1-397), DENV3 E80% (1-395), DENV4 E80% (1-397); DENV1 EI/II (1-291), DENV2 EI/II (1-291), DENV3 EI/II (1-289), DENV4 EI/II (1-291); DENV1 EIII (290-332), DENV2 EIII (290-332), DENV3 EIII (290-332), DENV4 EIII (290-332). The amino acid residues for full-length prM-protein constructs were as follows: DENV1 prM (1-166), DENV2 prM (1-166), DENV3 prM (1-166), DENV4 prM (1-166). The amino acid residues representing the soluble furin-cleaved portion of the prM-protein (rPr) were as follows: DENV1 pr (1-86), DENV2 pr (1-86), DENV3 pr (1-86), DENV4 pr (1-86). Recombinant E and prM-proteins were designed to include a StrepII tag at their C-terminal end to aid in purification and use in capture ELISA. Recombinant prM-proteins were constructed to include a glutathione *S*-transferase (GST) tag at their N-terminal end to aid with purification and solubility. Recombinant protein-containing supernatant used in capture ELISA was prepared in Sf21 insect cells grown in Grace's insect medium (GIBCO, 11605-094). Briefly, cells were grown in 150 cm<sup>2</sup> flasks (Corning, 431082) until 80% confluent prior to inoculating with baculovirus at an MOI of 1. After 5 days of incubation, cell supernatant containing recombinant DENV protein was harvested by centrifugation and frozen for later use.
